# Supplementary material for: Exclusive CX3CR1 dependence of kidney DCs impacts glomerulonephritis progression
Source: JCI journal article supplement (doi:10.1172/jci70143), 2013-09-02
Supplement: sd1 [file 1]

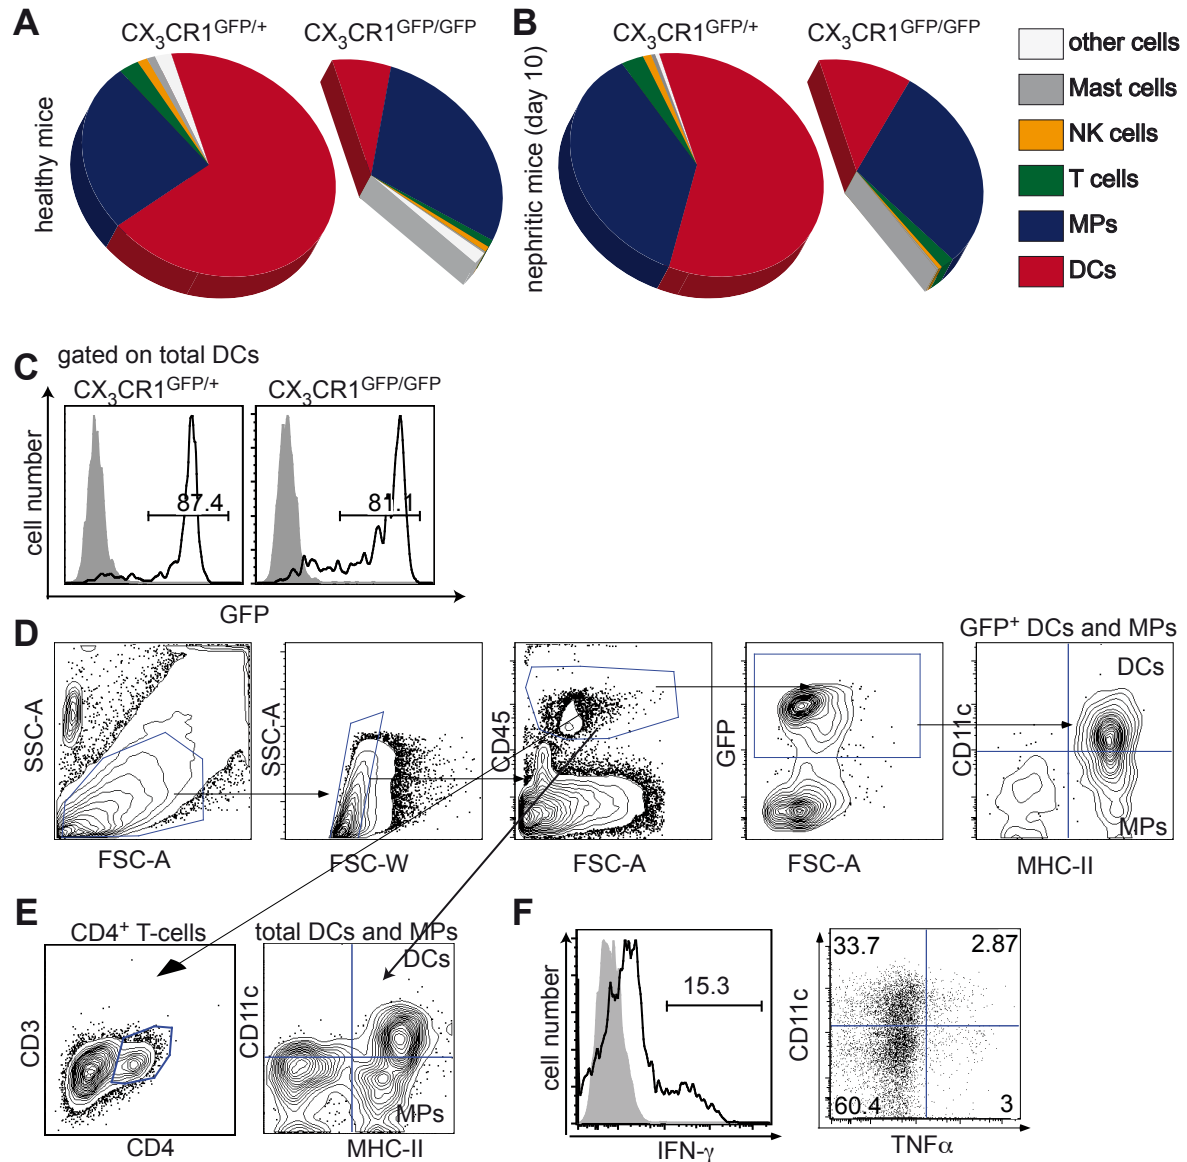

**Supplemental Figure 1: (A, B)** Proportions of Dendritic Cells (DCs), Macrophages (MPs), T cells, NK cells, Mast cells and other cells amongst GFP<sup>+</sup> cells in healthy (A) and 10-day-nephritic (B) CX<sub>3</sub>CR1<sup>GFP/+</sup> (left panels) mice and the remaining population in CX<sub>3</sub>CR1<sup>GFP/GFP</sup> mice (right panels, normalized to cell numbers in CX<sub>3</sub>CR1<sup>GFP/+</sup> mice). **(C)** GFP expression by total CD45<sup>+</sup> MHC-II<sup>+</sup> CD11c<sup>+</sup> cells in CX<sub>3</sub>CR1<sup>GFP/+</sup> and CX<sub>3</sub>CR1<sup>GFP/GFP</sup> mice (solid grey: wt control). **(D, E)** Gating strategy used throughout the study for GFP<sup>+</sup> DCs and MPs (D) and total CD4<sup>+</sup> T cells and DCs/MPs (E). **(F)** Representative FACS stainings for IFN $\gamma$ <sup>+</sup> CD4<sup>+</sup> T cells (right, gated on CD4<sup>+</sup> T cells as in D, E) and TNF $\alpha$ <sup>+</sup> DCs and MPs (gated on CD45<sup>+</sup> MHC-II<sup>+</sup> cells) isolated from 10-day-nephritic mice.

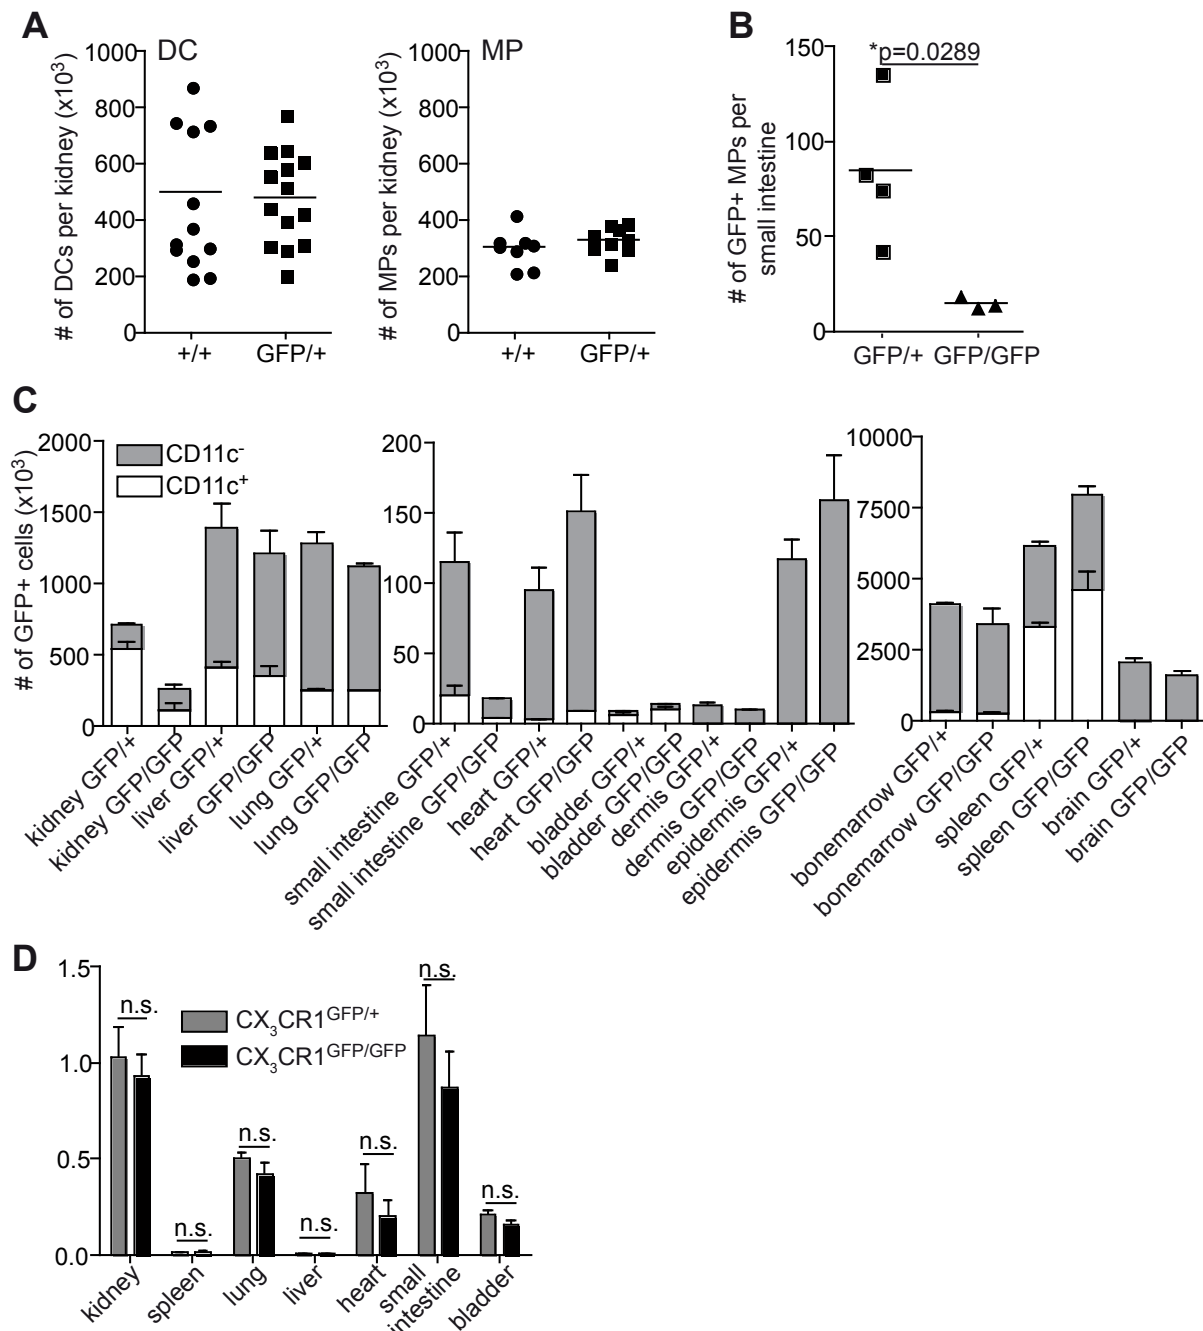

**Supplemental Figure 2: (A)** Absolute numbers of DCs and MPs in CX<sub>3</sub>CR1<sup>+/+</sup> and CX<sub>3</sub>CR1<sup>GFP/+</sup> mice. Results are combined from 3 individual experiments with 4-5 mice per group. **(B)** Absolute numbers of GFP<sup>+</sup> MPs in the small intestine of CX<sub>3</sub>CR1<sup>GFP/+</sup> and CX<sub>3</sub>CR1<sup>GFP/GFP</sup> mice. **(C)** Absolute numbers of GFP<sup>+</sup>CD11c<sup>-</sup> and GFP<sup>+</sup>CD11c<sup>+</sup> cells per organ, (bonemarrow per leg, dermis and epidermis per two ears). **(D)** Relative CX<sub>3</sub>CL1 expression in different organs of CX<sub>3</sub>CR1<sup>GFP/+</sup> and CX<sub>3</sub>CR1<sup>GFP/GFP</sup> mice normalized to expression in the kidneys of CX<sub>3</sub>CR1<sup>GFP/+</sup>. Results are representative for 2 individual experiments with 3-4 mice per group. Statistical significance was tested with the unpaired student's t-test (A, B) or one-way analysis of variances (one-way ANOVA) with Bonferroni multiple-comparison test (D).

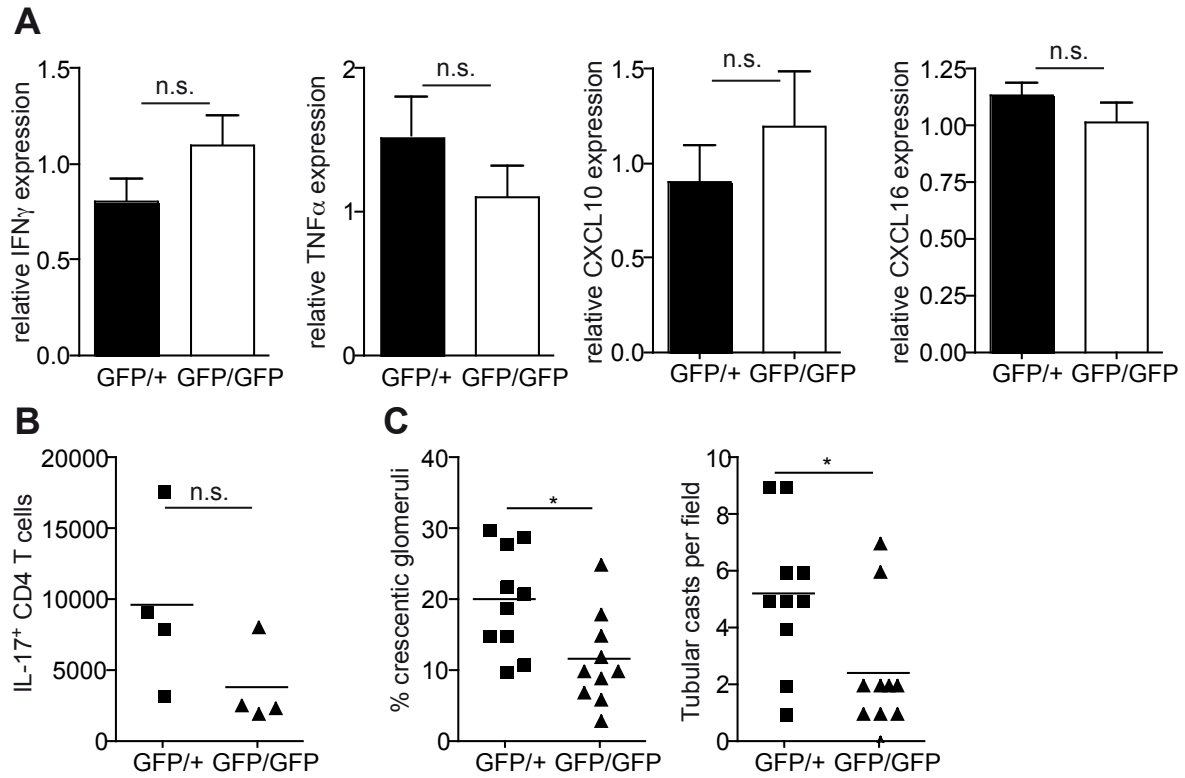

**Supplemental Figure 3: (A)** Relative expression of IFN $\gamma$ , TNF $\alpha$ , CXCL10 and CXCL16 in the kidneys of CX<sub>3</sub>CR1<sup>GFP/+</sup> (GFP/+) and CX<sub>3</sub>CR1<sup>GFP/GFP</sup> (GFP/GFP) mice 24 hours after immunization with NTS. **(B)** Absolut number of IL-17 producing CD4 T cells per kidney in CX<sub>3</sub>CR1<sup>GFP/+</sup> (GFP/+) and CX<sub>3</sub>CR1<sup>GFP/GFP</sup> (GFP/GFP) mice 10 days after immunization with NTS **(C)** Proportion of crescentic glomeruli (left) and tubular casts (right) in CX<sub>3</sub>CR1<sup>GFP/+</sup> (GFP/+) and CX<sub>3</sub>CR1<sup>GFP/GFP</sup> (GFP/GFP) mice on day 10 after NTN induction. Statistical analysis was performed using the unpaired Student's t-test (A, B) or the Mann-Whitney test (B).
